# Supplementary material for: Assessing Grain Quality Changes in White and Black Rice under Water Deficit
Source: MDPI journal article supplement (doi:10.3390/plants12244091), 2023-12-07
Supplement: s1 [file s1]

## Supplementary Data

**Table S1.** Analysis of variance of grain yield of three rice genotypes grown in different locations and water regimes.

|                         | <b>GY</b><br>(ton ha <sup>-1</sup> ) |
|-------------------------|--------------------------------------|
| <b>Genotype (G)</b>     |                                      |
| Quila 279101            | 5.16 ± 0.80 b                        |
| Quila 292008            | 3.15 ± 1.01 c                        |
| Zafiro                  | 6.59 ± 1.02 a                        |
| <b>Location (L)</b>     |                                      |
| San Carlos              | 5.03 ± 0.75 a                        |
| Parral                  | 4.91 ± 0.74 a                        |
| <b>Water regime (W)</b> |                                      |
| Flooding                | 7.35 ± 0.57 a                        |
| AWD                     | 2.58 ± 0.32 b                        |
| <b>p-value</b>          |                                      |
| G x L                   | <b>0.0031</b>                        |
| G x W                   | <b>0.0001</b>                        |
| L x W                   | <b>0.0001</b>                        |
| G x L x W               | <b>0.0004</b>                        |

GY: grain yield, AWD: Alternate wetting and drying. Data are mean values ± standard error (n = 3). Means with different letters are statistically different according to the LSD Fischer test ( $p \leq 0.05$ ).

**Table S2.** Mineral concentration in polished rice of three genotypes (Quila 279101, Quila 292008, and Zafiro-INIA) grown in two locations (San Carlos and Parral) and under two water regimes (flooding and AWD).

|                  | Na<br>(KeV) | Mg<br>(KeV) | Si<br>(KeV) | P<br>(KeV) | S<br>(KeV) | K<br>(KeV) | Ca<br>(KeV) | Mn<br>(KeV) | Fe<br>(KeV) | Co<br>(KeV) | Ni<br>(KeV) | Cu<br>(KeV) | Zn<br>(KeV) |
|------------------|-------------|-------------|-------------|------------|------------|------------|-------------|-------------|-------------|-------------|-------------|-------------|-------------|
| Genotype (G)     |             |             |             |            |            |            |             |             |             |             |             |             |             |
| Quila 279101     | 36.62 ab    | 30.45       | 44.84       | 39.52 a    | 33.35      | 408.22 a   | 50.96 a     | 291.46 a    | 343.26      | 384.04      | 477.92      | 608.87      | 871.27      |
| Quila 292008     | 38.72 a     | 29.42       | 45.33       | 38.75 b    | 35.85      | 368.08 ab  | 44.63 ab    | 284.38 ab   | 391.64      | 373.62      | 466.83      | 596.44      | 838.97      |
| Zafiro           | 35.79 b     | 30.01       | 43.93       | 30.72 b    | 35.54      | 294.91 b   | 37.74 b     | 266.57 b    | 335.77      | 384.33      | 480.97      | 607.16      | 876.02      |
| Location (L)     |             |             |             |            |            |            |             |             |             |             |             |             |             |
| Parral           | 36.92       | 30.21       | 45          | 37.1       | 36.06      | 370.53     | 45.36       | 283.66      | 369.49      | 374.31      | 469.75      | 600.97      | 844.54      |
| San Carlos       | 37.16       | 29.71       | 44.4        | 35.56      | 33.76      | 343.60     | 43.53       | 277.94      | 344.29      | 387.02      | 480.73      | 607.34      | 879.64      |
| Water regime (W) |             |             |             |            |            |            |             |             |             |             |             |             |             |
| Flooding         | 36.78       | 30.06       | 44.7        | 36.06      | 32.94      | 357.87     | 45.09       | 287.97      | 330.55      | 378.24      | 469.19      | 598.48      | 836.70 b    |
| AWD              | 37.30       | 29.86       | 44.7        | 36.6       | 36.89      | 356.26     | 43.79       | 273.63      | 383.22      | 383.09      | 481.29      | 609.83      | 887.47 a    |
| p-value          |             |             |             |            |            |            |             |             |             |             |             |             |             |
| G x L            | 0.952       | 0.582       | 0.943       | 0.896      | 0.558      | 0.9505     | 0.424       | 0.1142      | 0.582       | 0.6235      | 0.385       | 0.5162      | 0.7658      |
| G x W            | 0.502       | 0.325       | 0.859       | 0.573      | 0.439      | 0.8045     | 0.844       | 0.4407      | 0.105       | 0.1481      | 0.228       | 0.3318      | 0.3356      |

|           |       |       |       |       |       |        |       |        |       |        |       |        |        |
|-----------|-------|-------|-------|-------|-------|--------|-------|--------|-------|--------|-------|--------|--------|
| L x W     | 0.502 | 0.098 | 0.84  | 0.559 | 0.331 | 0.6048 | 0.600 | 0.058  | 0.403 | 0.3318 | 0.772 | 0.6584 | 0.9981 |
| G x L x W | 0.444 | 0.196 | 0.918 | 0.388 | 0.252 | 0.3867 | 0.165 | 0.8092 | 0.782 | 0.3618 | 0.216 | 0.7155 | 0.9646 |

KeV: Kiloelectron Volt. Means with different letters are statistically different according to the LSD Fischer test ( $p \leq 0.05$ ). AWD: Alternate wetting and drying. Data are mean values.  $n = 3$ .

**Table S3.** Concentration of phenolic compounds ( $\text{mg g}^{-1}$ ) in extracts of whole grain composite samples of three rice genotypes (Quila 279101, Quila 292008, and Zafiro-INIA) grown in two locations (San Carlos and Parral) and under two water regimes (flooding and alternate wetting and drying).

| Genotype     | Location | Condition | VA    | VAd*  | PHBA  | VNL   | CGA   | CA    | AGNd* | QCT   | C3G   | Sum phenolic compound |
|--------------|----------|-----------|-------|-------|-------|-------|-------|-------|-------|-------|-------|-----------------------|
| Quila 279101 | PA       | F         | 0.096 | 0.162 | nd    | nd    | 0.046 | 0.018 | 0.169 | 0.090 | 3.066 | 3.646                 |
| Quila 279101 | PA       | AWD       | 0.110 | 0.191 | nd    | nd    | 0.029 | 0.065 | 0.200 | 0.106 | 4.141 | 4.841                 |
| Quila 279101 | SC       | F         | 0.101 | 0.139 | nd    | nd    | 0.061 | 0.020 | 0.148 | 0.073 | 2.216 | 2.758                 |
| Quila 279101 | SC       | AWD       | 0.087 | 0.180 | nd    | nd    | 0.063 | 0.020 | 0.116 | 0.065 | 0.865 | 1.396                 |
| Quila 292008 | PA       | F         | 0.068 | 0.160 | nd    | 0.025 | 0.017 | 0.058 | 0.137 | 0.086 | 1.514 | 2.065                 |
| Quila 292008 | PA       | AWD       | 0.077 | 0.222 | nd    | 0.016 | 0.027 | 0.062 | 0.159 | 0.087 | 3.708 | 4.358                 |
| Quila 292008 | SC       | F         | 0.051 | 0.141 | nd    | 0.013 | 0.072 | 0.021 | 0.092 | 0.055 | 0.524 | 0.971                 |
| Quila 292008 | SC       | AWD       | 0.038 | 0.122 | nd    | 0.029 | 0.062 | 0.018 | 0.074 | 0.035 | 0.168 | 0.546                 |
| Zafiro-INIA  | PA       | F         | 0.013 | nd    | 0.034 | nd    | 0.036 | 0.008 | 0.008 | nd    | nd    | 0.099                 |
| Zafiro-INIA  | PA       | AWD       | 0.014 | nd    | 0.003 | nd    | 0.042 | 0.010 | 0.021 | nd    | nd    | 0.089                 |
| Zafiro-INIA  | SC       | F         | 0.014 | nd    | 0.045 | nd    | 0.049 | 0.017 | 0.010 | nd    | nd    | 0.135                 |
| Zafiro-INIA  | SC       | AWD       | 0.012 | nd    | 0.018 | nd    | 0.039 | 0.009 | 0.018 | nd    | nd    | 0.096                 |

nd: non-detected. AWD: Alternate wetting and drying. F: Flooding. PA: Parral. SC: San Carlos. Quila 219101 and Quila 292008; Black rice. Zafiro-INIA; White rice. VA: Vanillic acid, VAd\*: Vanillic acid derivative, PHBA: p-hydroxybenzoic acid, VNL: Vanillin, CGA: Chlorogenic acid, CA: Caffeic acid, AGNd\*: Apigenin derivative, QCT: Quercetin, C3G: Cyanidin 3-O-Glucoside.

**Table S4.** Concentration of phenolic compounds in polished grain extracts of three rice genotypes (Quila 279101, Quila 292008, and Zafiro-INIA) grown in two locations (San Carlos and Parral) and under two water regimes (flooding and alternate wetting and drying).

| Genotype     | Location | Condition | VA                     | Vad*                   | CGA                    | CA                     | AGNd*                  | QCT                    | C3G                    | Sum phenolic compound  |
|--------------|----------|-----------|------------------------|------------------------|------------------------|------------------------|------------------------|------------------------|------------------------|------------------------|
|              |          |           | ( $\text{mg g}^{-1}$ ) |
| Quila 279101 | PA       | F         | $0.048 \pm 0.004$      | $0.061 \pm 0.013$      | $0.016 \pm 0.007$      | $0.013 \pm 0.002$      | $0.066 \pm 0.015$      | $0.021 \pm 0.008$      | $0.047 \pm 0.027$      | $0.272 \pm 0.069$      |
| Quila 279101 | PA       | AWD       | $0.046 \pm 0.007$      | $0.050 \pm 0.011$      | $0.028 \pm 0.007$      | $0.010 \pm 0.002$      | $0.064 \pm 0.015$      | $0.018 \pm 0.005$      | $0.071 \pm 0.005$      | $0.287 \pm 0.041$      |
| Quila 279101 | SC       | F         | $0.037 \pm 0.005$      | $0.045 \pm 0.012$      | $0.018 \pm 0.002$      | $0.006 \pm 0.001$      | $0.048 \pm 0.009$      | $0.013 \pm 0.004$      | $0.013 \pm 0.006$      | $0.181 \pm 0.038$      |
| Quila 279101 | SC       | AWD       | $0.045 \pm 0.002$      | $0.090 \pm 0.007$      | $0.015 \pm 0.006$      | $0.010 \pm 0.003$      | $0.086 \pm 0.006$      | $0.036 \pm 0.005$      | $0.123 \pm 0.021$      | $0.405 \pm 0.044$      |
| Quila 292008 | PA       | F         | $0.014 \pm 0.001$      | $0.025 \pm 0.002$      | $0.005 \pm 0.004$      | $0.021 \pm 0.001$      | $0.023 \pm 0.003$      | $0.007 \pm 0.001$      | $1.069 \pm 0.086$      | $1.165 \pm 0.089$      |
| Quila 292008 | PA       | AWD       | $0.027 \pm 0.003$      | $0.051 \pm 0.006$      | $0.035 \pm 0.003$      | $0.010 \pm 0.002$      | $0.057 \pm 0.010$      | $0.019 \pm 0.005$      | $0.043 \pm 0.012$      | $0.241 \pm 0.039$      |
| Quila 292008 | SC       | F         | $0.016 \pm 0.001$      | $0.031 \pm 0.04$       | $0.022 \pm 0.004$      | $0.021 \pm 0.001$      | $0.026 \pm 0.001$      | $0.008 \pm 0.000$      | $1.129 \pm 0.126$      | $1.253 \pm 0.124$      |
| Quila 292008 | SC       | AWD       | $0.010 \pm 0.001$      | $0.027 \pm 0.003$      | $0.023 \pm 0.002$      | $0.010 \pm 0.002$      | $0.026 \pm 0.002$      | $0.008 \pm 0.001$      | $2.189 \pm 0.130$      | $2.292 \pm 0.131$      |
| Zafiro       | PA       | F         | $0.012 \pm 0.000$      | nd                     | nd                     | $0.011 \pm 0.002$      | $0.008 \pm 0.001$      | nd                     | nd                     | $0.031 \pm 0.003$      |

|        |    |     |               |    |               |               |               |    |    |               |
|--------|----|-----|---------------|----|---------------|---------------|---------------|----|----|---------------|
| Zafiro | PA | AWD | 0.011 ± 0.000 | nd | 0.027 ± 0.002 | 0.010 ± 0.001 | 0.007 ± 0.000 | nd | nd | 0.054 ± 0.001 |
| Zafiro | SC | F   | 0.013 ± 0.000 | nd | nd            | 0.008 ± 0.001 | 0.003 ± 0.002 | nd | nd | 0.024 ± 0.003 |
| Zafiro | SC | AWD | 0.009 ± 0.004 | nd | nd            | 0.021 ± 0.007 | 0.008 ± 0.004 | nd | nd | 0.038 ± 0.007 |

nd: non-detected. AWD: Alternative wet and drying. F: Flooding. PA: Parral. SC: Quila 219101 y Quila 292008: Black rice. Zafiro-INIA: White rice. VA: Vanillic acid, VAd\*: Vanillic acid derivative, CGA: Chlorogenic acid, CA: Caffeic acid, AGNd\*: Apigenin derivative, QCT: Quercetin, C3G: Cyanidin 3-O-Glucoside. Data are mean values ± standard error (n = 3).

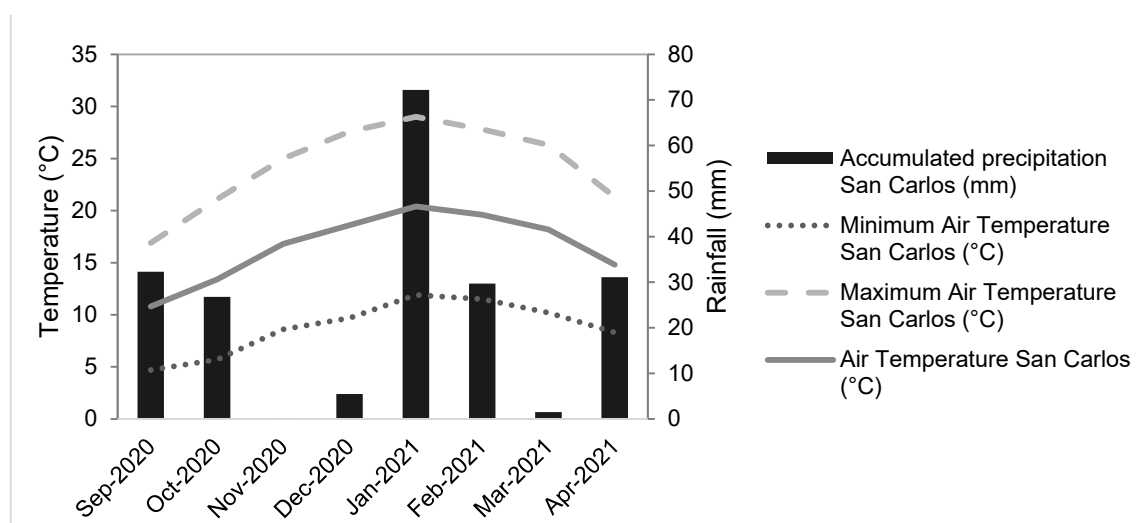

**Figure S1.** Agrometeorological data of air temperature (maximum, minimum, and average), and accumulated rainfall recorded in San Carlos in the 2020-2021 season.

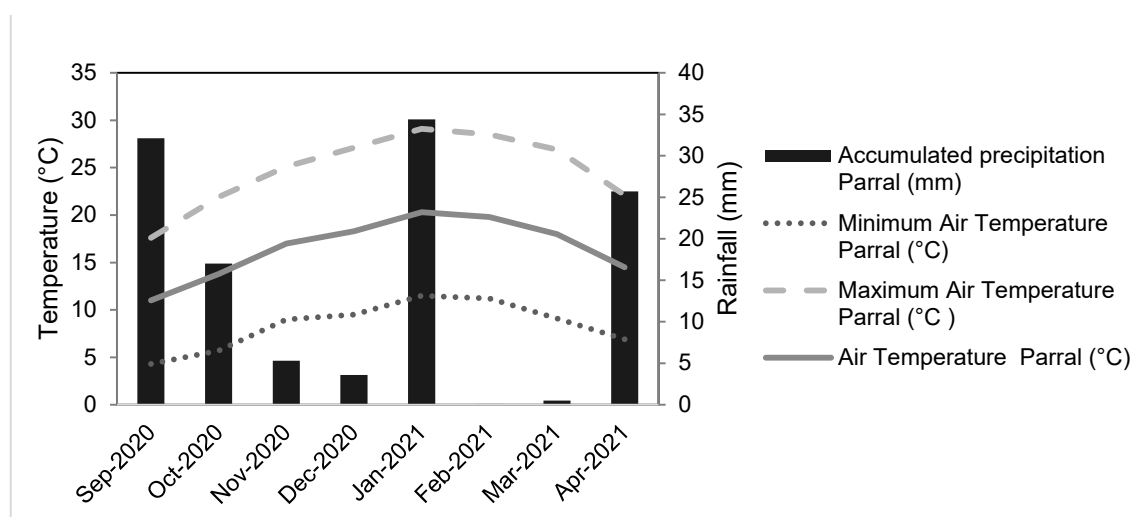

**Figure S2.** Agrometeorological data of air temperature (maximum, minimum, and average), and accumulated rainfall recorded in Parral in the 2020-2021 season.

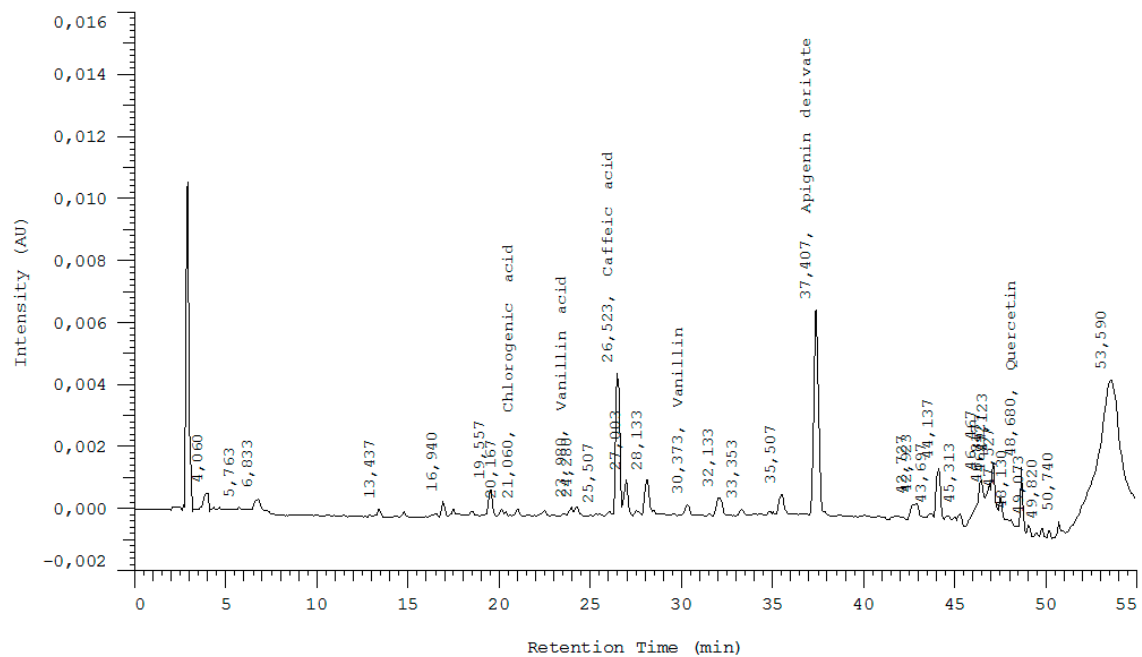

**Figure S3.** Chromatogram of a polished grain sample of the Quila 279101 genotype measured in HPLC at 320 nm.

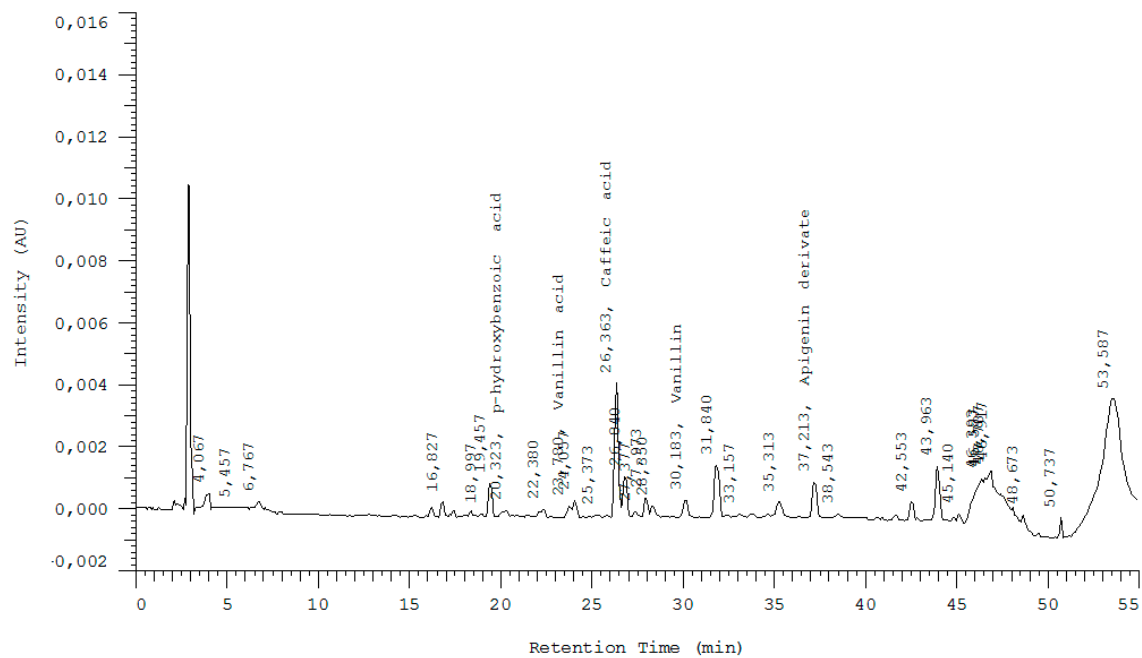

**Figure S4.** Chromatogram of a whole grain sample of the cultivar Zafiro-INIA measured in HPLC at 320 nm.
